# Supplementary material for: Suberoylanilide Hydroxamic Acid Treatment Reveals Crosstalks among Proteome, Ubiquitylome and Acetylome in Non-Small Cell Lung Cancer A549 Cell Line
Source: PubMed Central journal article supplement (PMC4379480; doi:10.1038/srep09520), 2015-03-31

# **Suberoylanilide Hydroxamic Acid Treatment Reveals Crosstalks among Proteome, Ubiquitylome and Acetylome in Non-Small Cell Lung Cancer A549 Cell Line**

Quan Wu<sup>1</sup>, Zhongyi Cheng<sup>2</sup>, Jun Zhu<sup>3</sup>, Weiqing Xu<sup>1</sup>, Xiaojun Peng<sup>3</sup>, Chuangbin Chen<sup>3</sup>, Wenting Li<sup>1</sup>, Fengsong Wang<sup>4</sup>, Lejie Cao<sup>5</sup>, Xingling Yi<sup>3</sup>, Zhiwei Wu<sup>1</sup>, Jing Li<sup>1</sup>, Pingsheng Fan<sup>6</sup>

<sup>1</sup> Central Laboratory of Medical Research Centre, Affiliated Provincial Hospital, Anhui Medical University, Hefei, 230001, China

<sup>2</sup> Institute for Advanced Study of Translational Medicine, Tongji University, Shanghai, 200092, China

<sup>3</sup> Jingjie PTM Biolab (Hangzhou) Co. Ltd, Hangzhou 310018, China

<sup>4</sup> School of Life science, Anhui Medical University, Hefei, 230032, China

<sup>5</sup> Department of Respiration, Affiliated Provincial Hospital, Anhui Medical University, Hefei, 230001, China

<sup>6</sup> Department of Oncology, Affiliated Provincial Hospital, Anhui Medical University, Hefei, 230001, China

Correspondence and requests for materials should be addressed to

Q.W. (powerwoo01@ahmu.edu.cn, Ph: +86-551-62283574, fax: +86-551-62283292)

or P.S.F. (fanpingsheng@csc.org.cn, Ph: +86-551-65897876, fax: +86-551-62283292)

## **Bioinformatic Analysis**

**Enrichment of Gene Ontology analysis.** Proteins were classified by GO annotation into three categories: biological process, cellular compartment and molecular function. For each category, we used Functional Annotation Tool of DAVID Bioinformatics Resources 6.7 to identify enriched GO against the background of Homo sapiens. A two-tailed Fisher's exact test was employed to test the enrichment of the protein-containing IPI entries against all IPI proteins. Correction for multiple hypothesis testing was carried out using standard false discovery rate control methods. The GO with a corrected p-value  $< 0.05$  is considered significant.

**Enrichment of pathway analysis.** Encyclopedia of Genes and Genomes (KEGG) database was used to identify enriched pathways by Functional Annotation Tool of DAVID against the background of Homo sapiens. A two-tailed Fisher's exact test was employed to test the enrichment of the protein-containing IPI entries against all IPI proteins. Correction for multiple hypothesis testing was carried out using standard false discovery rate control methods. The pathway with a corrected p-value  $< 0.05$  was considered significant. These pathways were classified into hierarchical categories according to the KEGG website.

**Enrichment of protein domain analysis.** For each category proteins, InterPro (a resource that provides functional analysis of protein sequences by classifying them into families and predicting the presence of domains and important sites) database was researched using Functional Annotation Tool of DAVID against the background of Homo sapiens. A two-tailed Fisher's exact test was employed to

test the enrichment of the protein-containing IPI entries against all IPI proteins. Correction for multiple hypothesis testing was carried out using standard false discovery rate control methods and domains with a corrected p-value < 0.05 were considered significant.

**Enrichment of complex analysis.** Manually curated CORUM protein complex database for human was used for protein complex analysis. Overrepresented complexes were identified using hypergeometric test for each category proteins. A two-tailed Fisher's exact test was employed to test the enrichment of the protein-containing SwissProt entries against all SwissPort human proteins. Correction for multiple hypothesis testing was carried out using standard false discovery rate control methods and complexes with a corrected p-value < 0.05 were considered significant.

**Enrichment-based clustering analysis.** All the protein categories obtained after enrichment were collated along with their P values, and then filtered for those categories which were at least enriched in one of the clusters with P value<0.05. This filtered P value matrix was transformed by the function  $x = -\log_{10}(\text{P value})$ . Finally these x values were z-transformed for each category. These z scores were then clustered by one-way hierarchical clustering (Euclidean distance, average linkage clustering) in Genesis. Cluster membership was visualized by a heat map using the "heatmap.2" function from the "gplots" R-package.

**Protein-protein interaction network analysis.** We analyzed protein-protein interaction for identified proteins using Cytoscape software.

Protein-protein interaction network obtained from STRING database. STRING defines a metric called “confidence score” to define interaction confidence; we fetched all interactions that had a confidence score  $\geq 0.7$  (high confidence). Interaction network from STRING was visualized in Cytoscape. A graph theoretical clustering algorithm, molecular complex detection (MCODE) was utilized to analyze densely connected regions. MCODE is part of the plug-in tool kit of the network analysis and visualization software Cytoscape.

## **Figure Legends**

**Figure S1. Functional enrichment-based clustering analysis for the quantified proteome.** A, cellular component analysis. B, biological process analysis. C, molecular function analysis. D, protein domain analysis. E, KEGG pathway analysis. F, protein complex analysis.

**Figure S2. Functional enrichment-based clustering analysis for the quantified ubiquitylome.** A, protein domain analysis. B, protein complex analysis.

**Figure S3. Protein-protein interaction network of ubiquitylome established using Cytoscape.**

**Figure S4. Functional enrichment-based clustering analysis for the quantified acetylome.** A, protein domain analysis. B, protein complex analysis.

**Figure S5. Protein-protein interaction network of acetylome established using Cytoscape.**

**Figure S6. MS/MS spectra of HSPA8 K601 acetylation and ubiquitination.** A, acetylation. B, ubiquitination. This site was both undergo acetylation and ubiquitination.

**Figure S1**

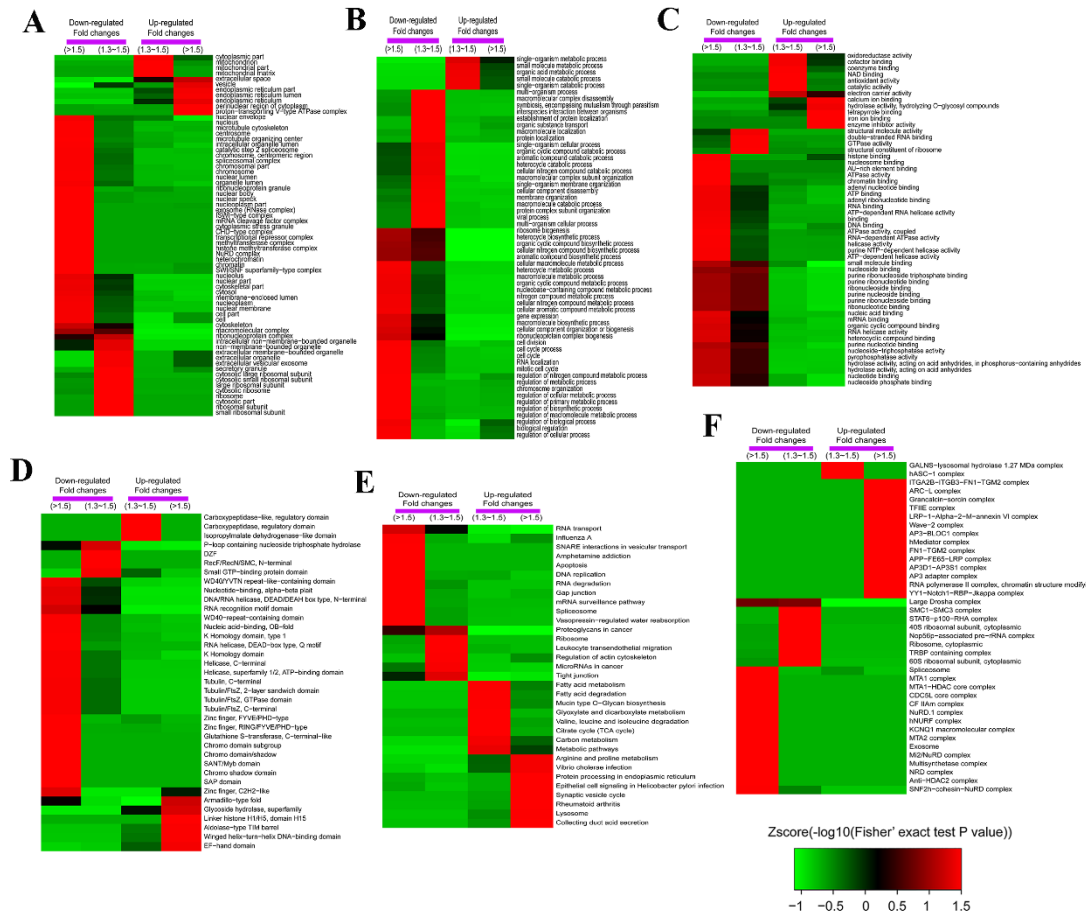

Figure S2

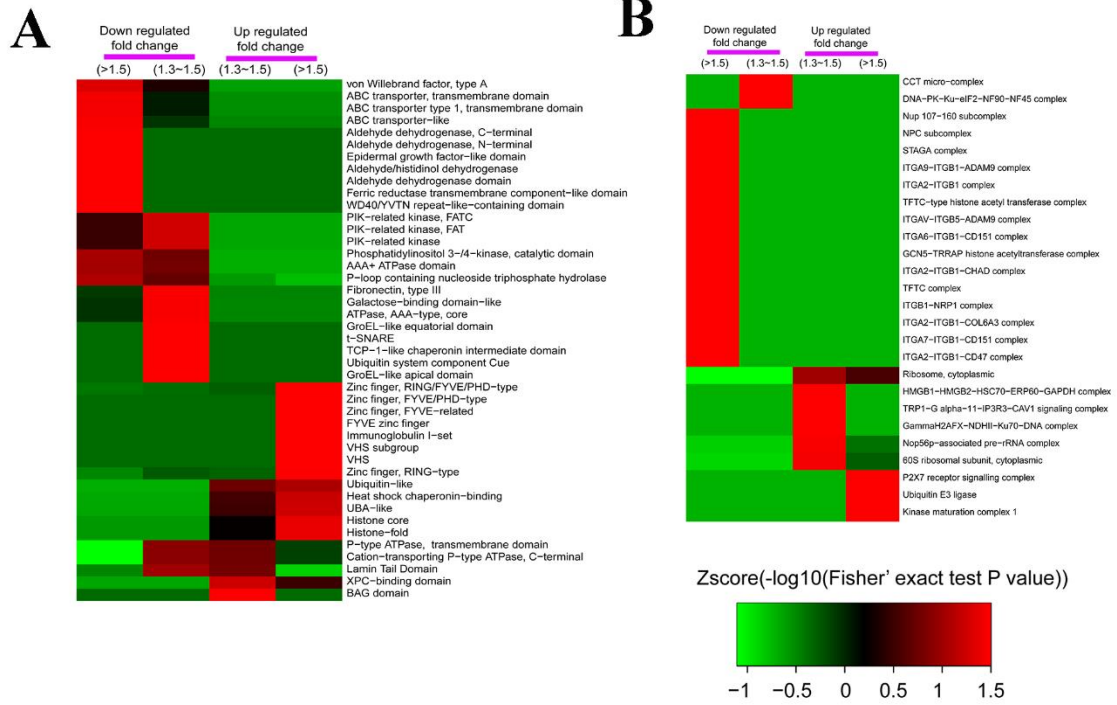

Figure S3

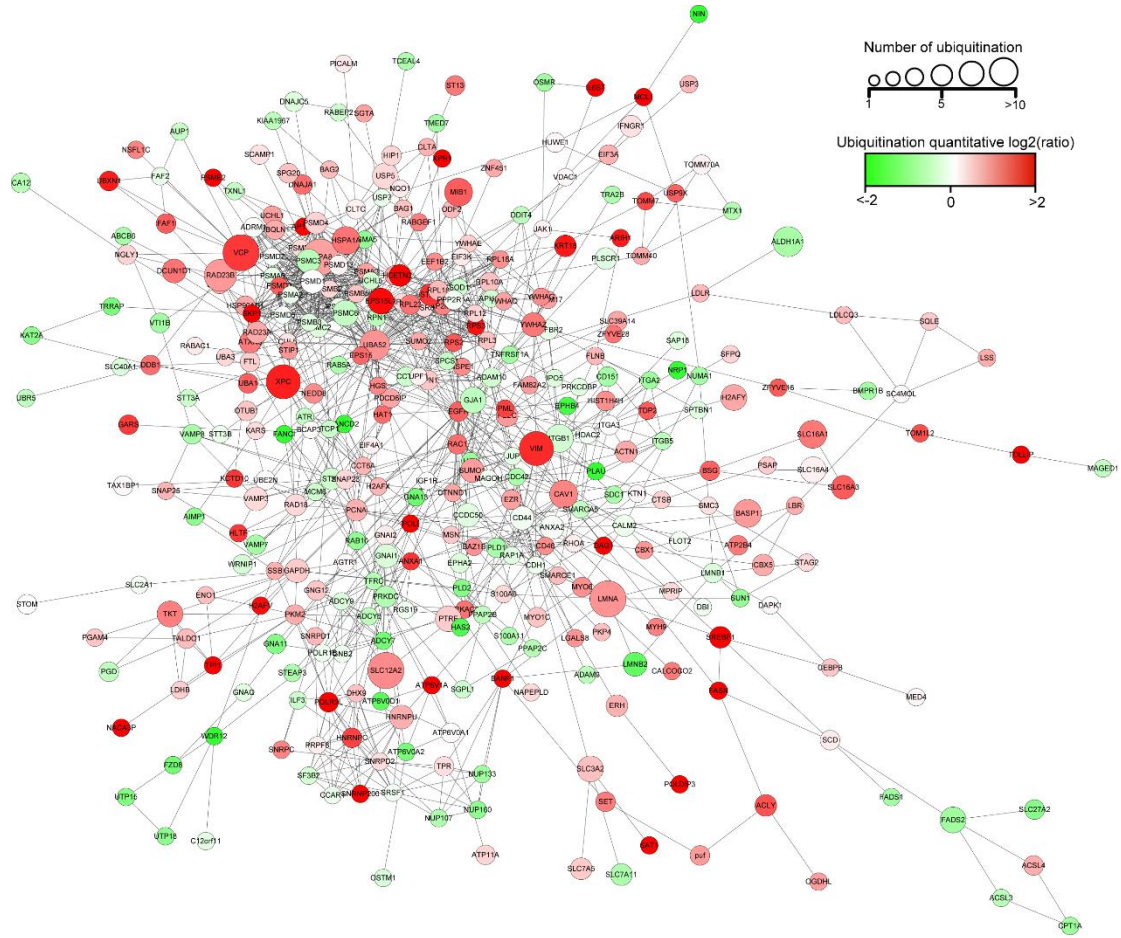



Figure S4

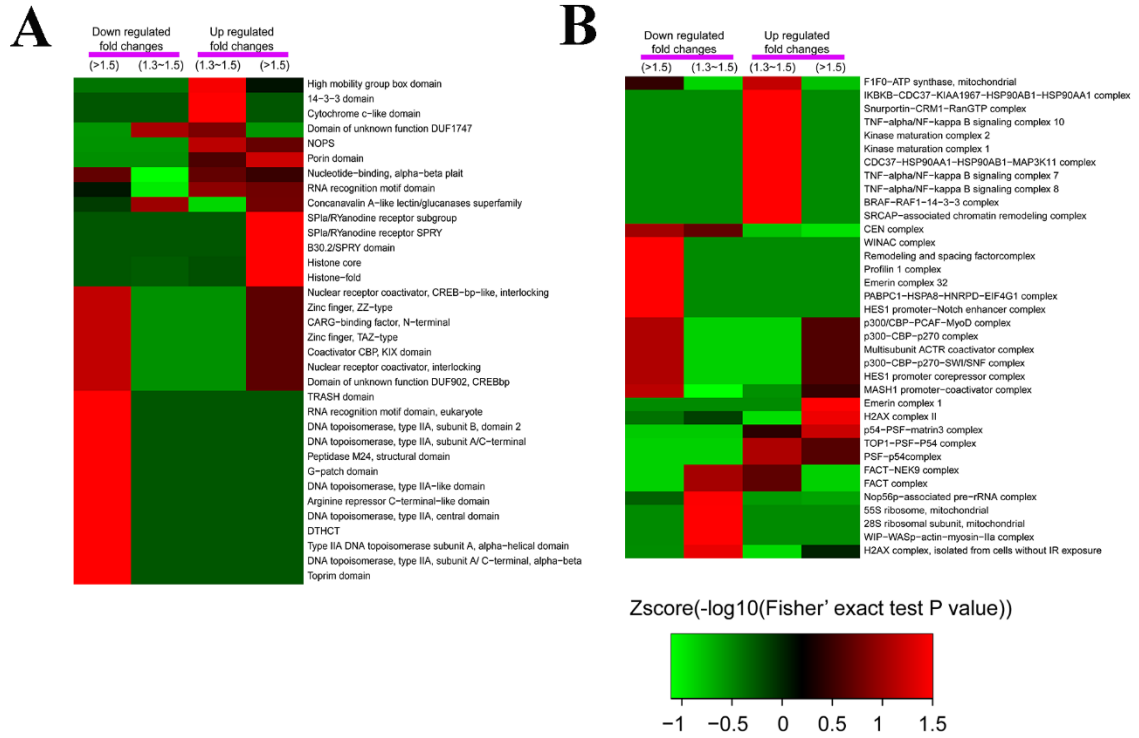

Figure S5

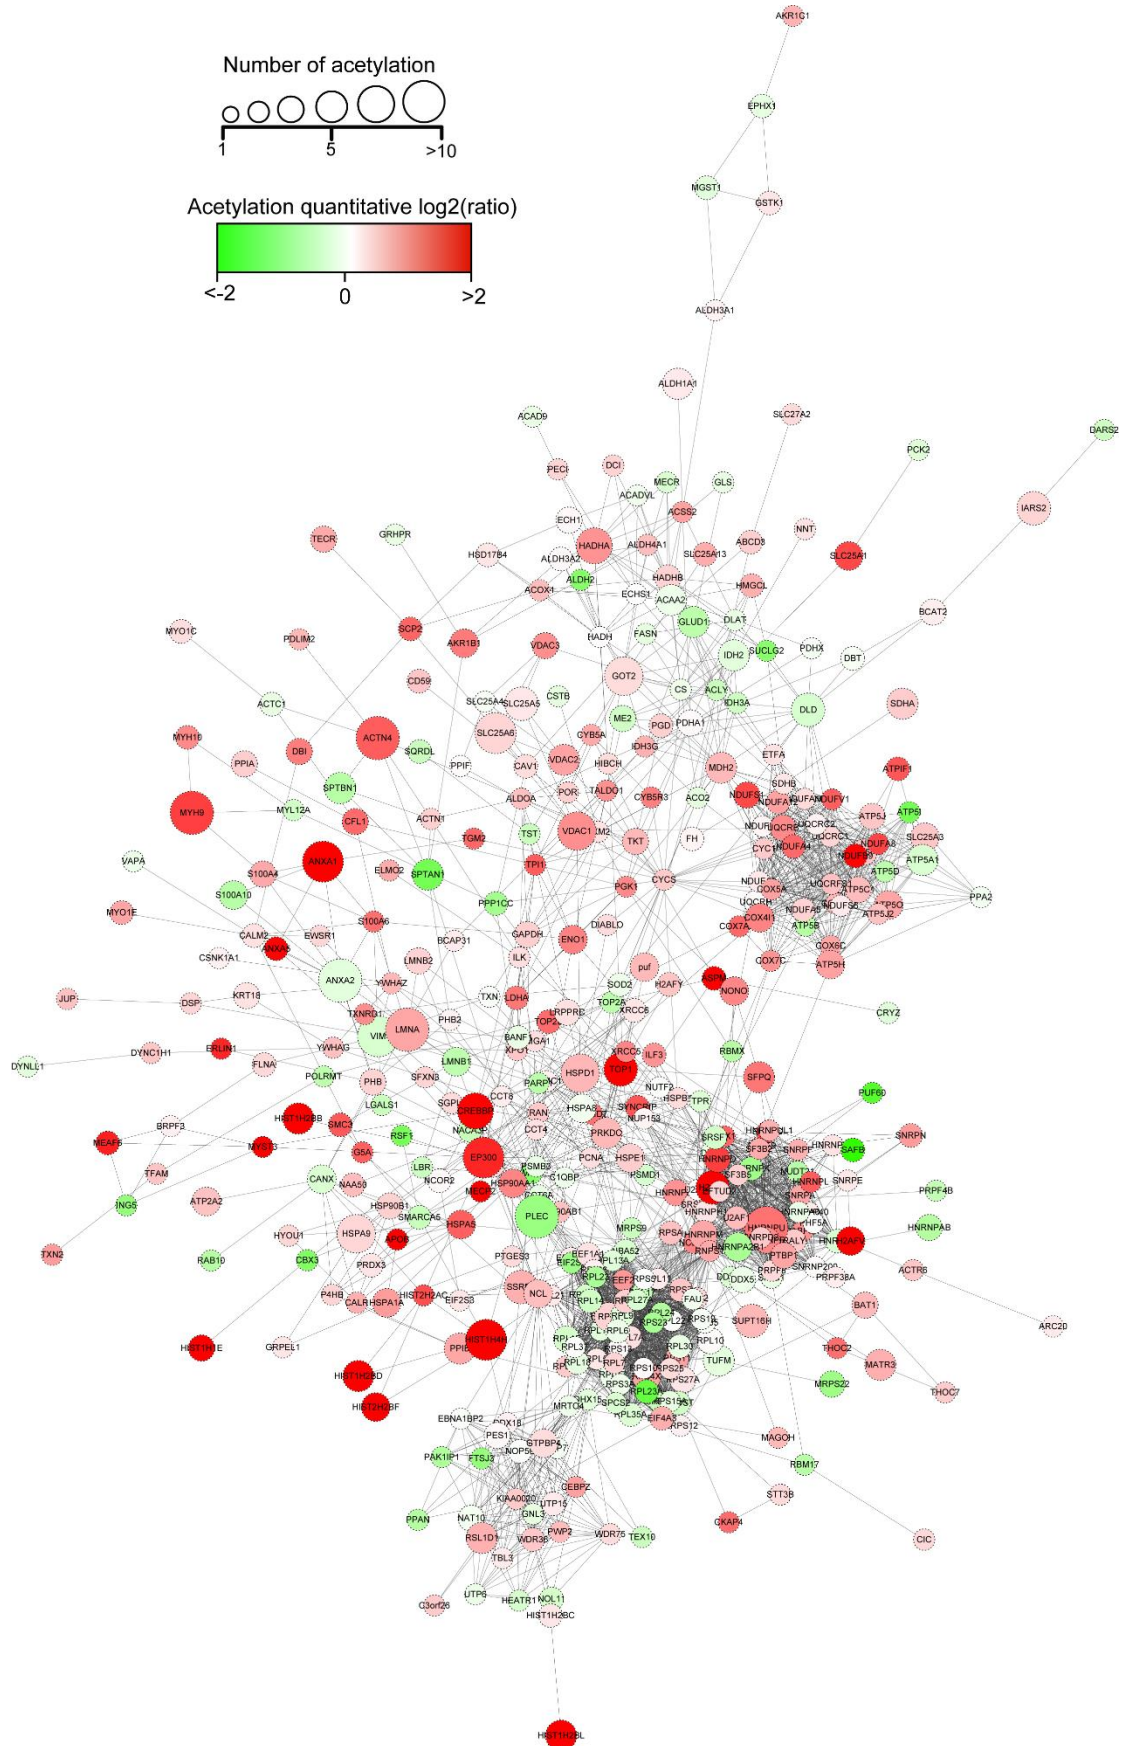

Figure S6

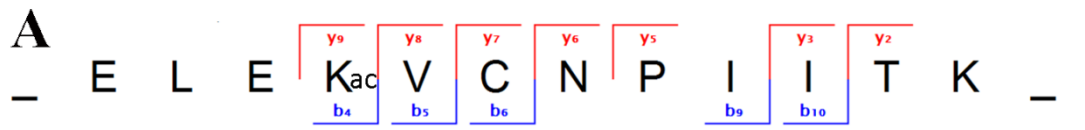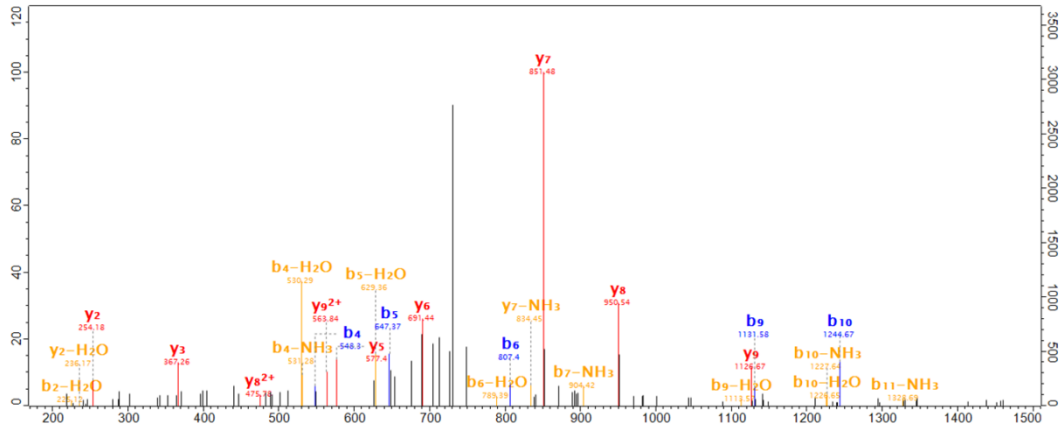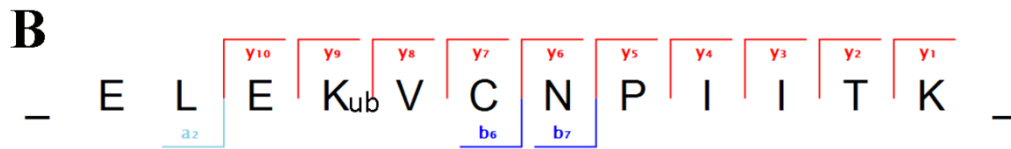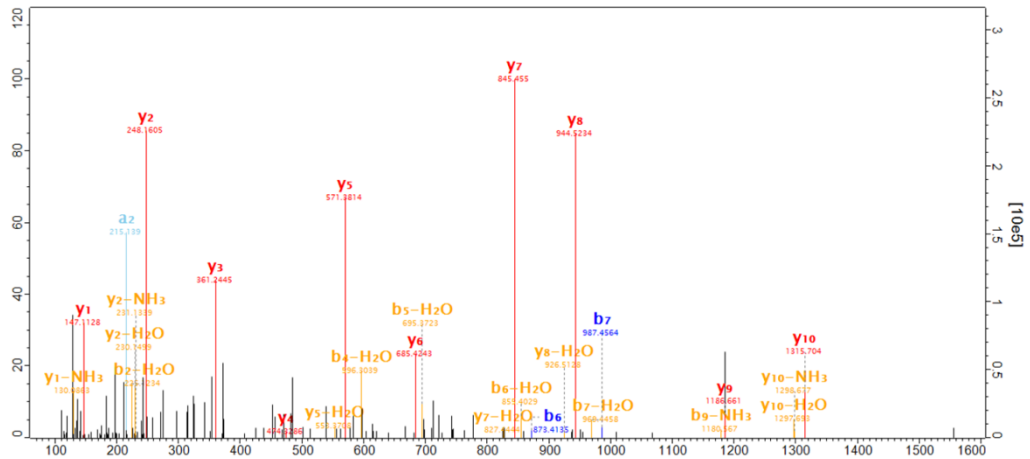

Supplement: srep09520-s1.pdf [file srep09520-s1.pdf]
